# Supplementary material for: Emergent Hybrid Surgical Approaches for Non-Dissecting Ruptured Kommerell's Aneurysm: A Case Series
Source: Research Square preprint supplement (doi:10.21203/rs.3.rs-2105675/v1), 2022-10-05
Supplement: Supplementary file 1 [file a9474a642d7d24cea348ac9a.xlsx]

## Sheet: Hoja1
Reported Kommerell's Aneurysms
Authors	Year	Study Title	Study Design	Patients Involved	Patient Age (years)	Clinical presentation	KA Type	KA Diameter (mm) *	Surgical technique performed
Cinà, et al.	2004	Kommerell's diverticulum and right-sided aortic arch: a cohort study and review of the literature	Case Series	3	Mean 47 (Range 21 - 67)	1/3 claudication of the left arm. 1/3 dysphagia, epigastric discomfort, and palpitations. 1/3 dry cough and occasional dysphagia	Type II	Mean 41 (range 30 - 64)	3/3 A left subclavian-to-carotid transposition was performed. 2/3 interposition graft. 1/3 endoaneurysmorrhaphy.
Kaki, et al.	2005	Kommerell's Diverticular Rupture Complicated by Aberrant Left Subclavian Artery and Right Aortic Arch Successfully Treated Surgically	Case Report	1	73	Chest and back pain	Ruptured Type II	35	Initial open proximal anastomosis was performed with a branched vascular graft. Then the vascular graft was clamped, and reperfusion of the upper part of the body was started for distal anastomosis site of the KA after reconstruction of the aLSA
Kuan-Ming, et al.	2007	Kommerell’s aneurysm	Case Report	1	54	Sudden onset chest pain with radiation to back	Non-Ruptured dissecting Type II	Non-reported	Thoracic aortic replacement from mid-arch to low thoracic aorta and reconstruction of both subclavian arteries.
Kouchoukos, et al.	2007	Aberrant subclavian artery and Kommerell aneurysm: Surgical treatment with a standard approach	Case Series	10	Mean 65 (range 46-82)	6/10 presented chest, back, or shoulder pain. 1/10 had paralysis of the left vocal cord. 3/10 were asymptomatic.	8/10 Type I 2/10 Type II	Mean 58 (range 35 - 77)	4/10 underwent preliminary carotid-to-aberrant subclavian artery bypass and ligation of the subclavian artery proximal to the origin of the vertebral artery. 10/10 had graft replacement of the subclavian artery and descending thoracic aneurysms. 6/10 ontinuity of the aberrant subclavian artery was preserved.
Cruz-Siria et al.	2011	Hybrid treatment of a symptomatic aneurysm of a Kommerell's diverticulum	Case Report	1	62	Chest pain and dysphagia	Type I	32	Hybrid two stages surgery with initial left carotid-subclavian bypass and after two months the patient underwent TEVAR + arteriotomy of right subclavian artery. KA was embolized by 5 coils and posterior right subclavian artery reimplantation at the origin of right carotid artery was performed. Finally embolization of left subclavian artery was performed.
Lamb, et al.	2014	Hybrid endovascular treatment of an aberrant right subclavian artery with Kommerell aneurysm	Case report	1	82	Dishagia lussoria, weight loss and chest pain.	Type I	35	Three-staged hybrid approach: left carotid subclavian bypass, right carotid-subclavian bypass and TEVAR
Lococo, et al.	2016	Successful Conservative Treatment of a Kommerell Aneurysm Associated With Right-Sided Aortic Arch	Case report	1	73	Incidental finding, asymptomatic.	Type II	29	Radiologic surveillance due to advanced malignancy
Ben Abdallah, et al.	2017	Random Finding of a Ruptured Kommerell Aneurysm After Stroke	Case report	1	74	Worsening of disphagia and chest pain, incidental finding	Ruptured Type I	81	One-stage hybrid endovascular procedure, initially a TEVAR was performed associated with cervical debranching of the LSA, then left carotid endarterectomy was done
Wong, et al.	2017	Saccular Kommerell aneurysm, a potential pitfall on MDCT imaging – A review of imaging features and potential mimics	Case series	1	78	Chest pain and anterolateral ST elevation	Saccular Type I	41	Surgical approach, no details
Tzilalis et al.	2018	Hybrid treatment for a type 2 Kommerell’s aneurysm in a nonagenarian	Case Report	1	90	Synchronous diaphragmatic flutter	Type II	117	1-stage LCCA-subclavian bypass and thoracic endografting distal to the origin of the RSA. A vascular plug occluded the aLSA proximal to his LVA
Ikeno, et al.	2019	Graft Replacement of Kommerell Diverticulum and In Situ Aberrant Subclavian Artery Reconstruction	Case Series	17	Mean 68.2 ± 12.7 (range 42-89)	11/17 asymptomatic. 2/17 dysphagia. 2/17 chest pain. 1/17 chest discomfort. 1/17 hoarseness.	6/17 Type I 1/6 Type I rKA dissecting not-ruptured 1/6 Type I rKA non-dissceting. 11/17 Type II 1/11 type II rKA	Mean 50.1 ± 7.3 (range 32.9 - 66)	5/17 Total arch replacement through a median sternotomy. 9/17 Graft replacement of the descending aorta through a posterolateral thoracotomy. 2/17 Extensive replacement from the aortic arch to the descending aorta through a posterolateral thoracotomy.
Singh, et al.	2020	Intraoperative retrograde TEVAR to control endoleak after emergent total arch replacement and frozen elephant trunk repair for ruptured Kommerell's diverticulum	Case Report	1	62	Acute onset tearing chest pain	Dissecting Ruptured Type I + Intramural Hematoma	40	Right carotid subclavian bypass, followed by open debranching of the bilateral carotid arteries, zone II arch replacement with proximal intrathoracic ligation of ARSA and LSCA, and a FET. Due to a type IA endoleak a retrograde TEVAR was perfomed
Mattioli. et al.	2020	Unusual cause of back pain and dysphagia: a Kommerell aneurysm	Case Report	1	85	Back pain and dysphagia that started	Saccular Type I	65	Conservative, no details
Herrán de la Gala, et al.	2021	Kommerell diverticulum aneurysm and bicuspid aortic valve	Case Report	1	54	Incidental finding, follow-up by cardiology due to a bicuspid aortic valve and moderate stable angina with progressive worsening.	Saccular Type I	66	1 stage double coronary artery bypass and placement of a hybrid FET
Gergen, et al.	2021	Endovascular aortic repair of Kommerell diverticulum associated with aberrant left subclavian artery	Case Report	1	62	Shortness of breath, dysphagia, and an unintentional 20-pound weight loss over the last three months	Type I	35	3 staged repair: left carotid-subclavian bypass, thoracic endovascular aortic repair (TEVAR), and finally left videoassisted thoracoscopic surgical (VATS) division of the aberrant left subclavian artery and vascular ring.
Godfrin, et al.	2021	Kommerell Aneurysm	Case report	1	73	Hemoptysis due to lung mass, incidental finding.	Non-reported	Non-reported	Radiologic surveillance due to malignancy
Table 1: Summary of reported Komerell's aneurysms reported in the literature. *KA were considered to be those larger than 30 mm, even though they were described as KD.
