# Supplementary material for: Emergent Hybrid Surgical Approaches for Non-Dissecting Ruptured Kommerell's Aneurysm: A Case Series
Source: Research Square preprint supplement (doi:10.21203/rs.3.rs-2105675/v1), 2022-10-05
Supplement: Supplementary file 2 [file d23945933900196fdb3e945d.xlsx]

## Sheet: Sheet1
Patients characteristics
Clinical Presentation
Sociodemographic information	Mean Age (years)	66,67 ± 7,76
	Male	3/3.
	Hypertension	2/3.
Symptoms	Dyspnea	2/3.
	Dysfagia	1/3.
	Dysphonia	1/3.
	Atypical chest pain	2/3.
	General malaise	1/3.
	Lipothymia	1/3.
	Headache	2/3.
Signs	Hypotension	2/3.
	Tachycardia	2/3.
	Tachypnea	2/3.
CT Findings
KA Characteristics	Mean diameter (mm)	63,67 ± 5,69
	Ruptured KA	2/3.
	Unruptured KA	1/3.
Approach
Urgency of the Approach		3/3.
Operative times	Mean Clamp Time (min)	140 ± 60,75
	Mean Cardiac Arrest Time (min)	51,33 ± 3,06
Hybrid Procedure	Frozen Elephant Trunk	2/3.
	Carotid subclavian derivation + placement of an endoprosthes is in the distal arch and descending aorta	1/3.
Postoperative data
Mean Hospital Stay Time		13,67 ± 5,51
Medical complications	Infection	2/3.
	Shock	2/3.
	Others	2/3.
	Death	1/3.
Table 2: characteristics of patients type-1 non-dissecting rKA managed with a hybrid approach.
